# Supplementary material
Source: PubMed Central journal article supplement (PMC6130963)
Supplement: supp_RA118.002263_135792_1_supp_166429_pbnh95.pdf [file supp_RA118.002263_135792_1_supp_166429_pbnh95.pdf]

**Supplemental Table 1. Data collection and refinement statistics.**

| <b>FliN<sub>C</sub>/FliY<sub>C</sub></b>            |                            |
|-----------------------------------------------------|----------------------------|
| <b>Data collection</b>                              |                            |
| Space group                                         | P 1                        |
| Cell dimensions                                     |                            |
| <i>a</i> , <i>b</i> , <i>c</i> (Å)                  | 48.21, 49.21, 52.37        |
| $\alpha$ , $\beta$ , $\gamma$ (°)                   | 69.34, 82.98, 76.01        |
| Resolution (Å)                                      | 29.42 - 2.50 (2.60 - 2.50) |
| R-meas                                              | 0.057 (0.117)              |
| CC1/2                                               | 0.994 (0.980)              |
| I/ $\sigma$ (I)                                     | 6.0 (3.0)                  |
| Completeness (%)                                    | 87.3 (89.6)                |
| Redundancy                                          | 1.9 (1.9)                  |
| <b>Refinement</b>                                   |                            |
| Resolution (Å)                                      | 25.37 – 2.5                |
| No. reflections                                     | 13190                      |
| <i>R</i> <sub>work</sub> / <i>R</i> <sub>free</sub> | 0.2026/0.2286              |
| No. atoms                                           | 2486                       |
| Protein                                             | 2408                       |
| Ligand/ion                                          | -                          |
| Water                                               | 78                         |
| B-factors                                           | 43.2                       |
| Protein                                             | 43.0                       |
| Ligand/ion                                          | -                          |
| Water                                               | 47.5                       |
| R.m.s. deviations                                   |                            |
| Bond lengths (Å)                                    | 0.009                      |
| Bond angles (°)                                     | 1.220                      |

Statistics for the highest-resolution shell are shown in parentheses.

## Supplemental Figure 1

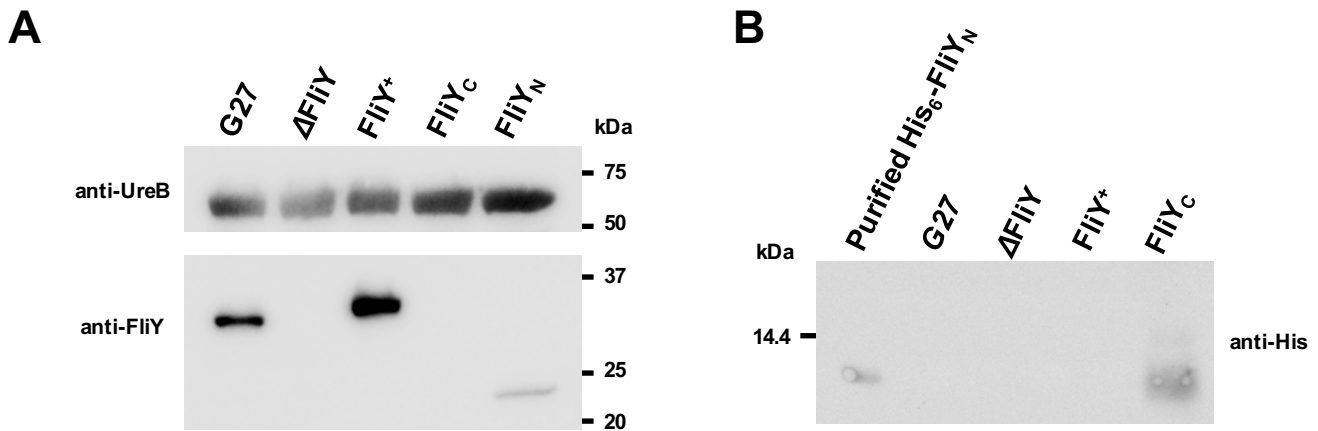

**Western analysis of FliY, FliY<sub>N</sub> and FliY<sub>C</sub> expression in complemented strains.** (A). Expression of FliY and FliY<sub>N</sub> was detected using anti-FliY antibody which was raised by using purified recombinant FliY<sub>N</sub> protein. Loading control using urease B was included. (B). Expression of FliY<sub>C</sub> was detected using anti-His antibody. We are not able to detect the his<sub>6</sub>-FliY in FliY<sup>+</sup> complemented strain using anti-His antibody, possibly due to the N-terminal his<sub>6</sub>-tag in FliY is degraded. *H. pylori* cells were cultured in BB10 medium with a starting OD<sub>600</sub>=0.02. After an overnight incubation, the cells were collected and washed with PBS. OD<sub>600</sub> was measured for each strain and same amount of cells were used for the western experiments.

## Supplemental Figure 2

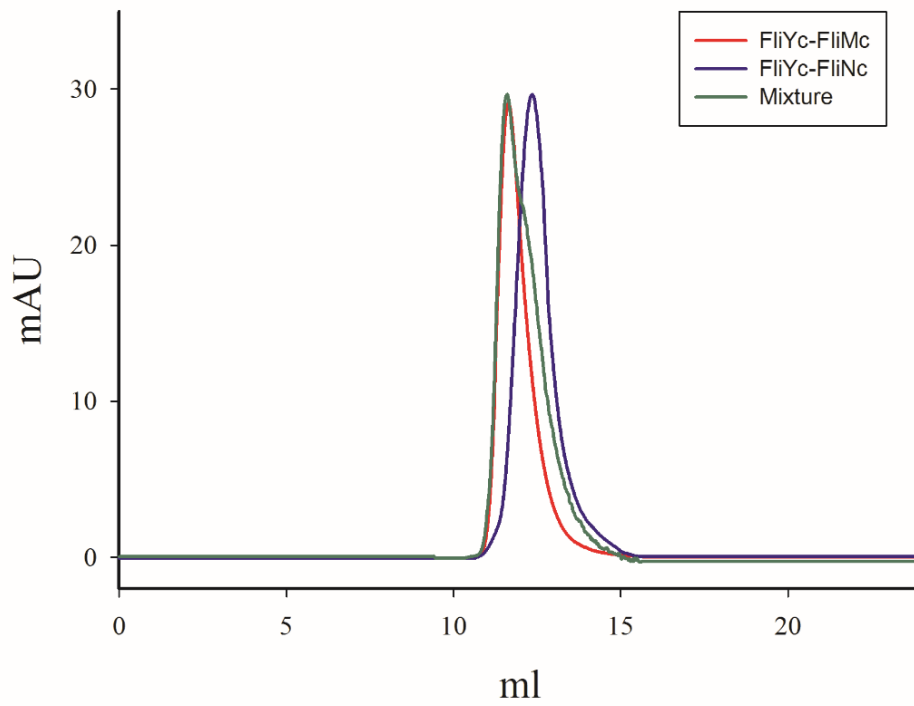

**FliY<sub>C</sub>-FliM<sub>C</sub> complex does not interact with FliY<sub>C</sub>-FliN<sub>C</sub> complex.** Purified FliY<sub>C</sub>-FliN<sub>C</sub> and FliY<sub>C</sub>-FliM<sub>C</sub> complexes were mixed at equimolar ratio at 4°C for overnight and were separated by Superdex S75. The elution profiles of FliY<sub>C</sub>-FliN<sub>C</sub> and FliY<sub>C</sub>-FliM<sub>C</sub> were overlaid for comparison.



Supplemental Figure 4

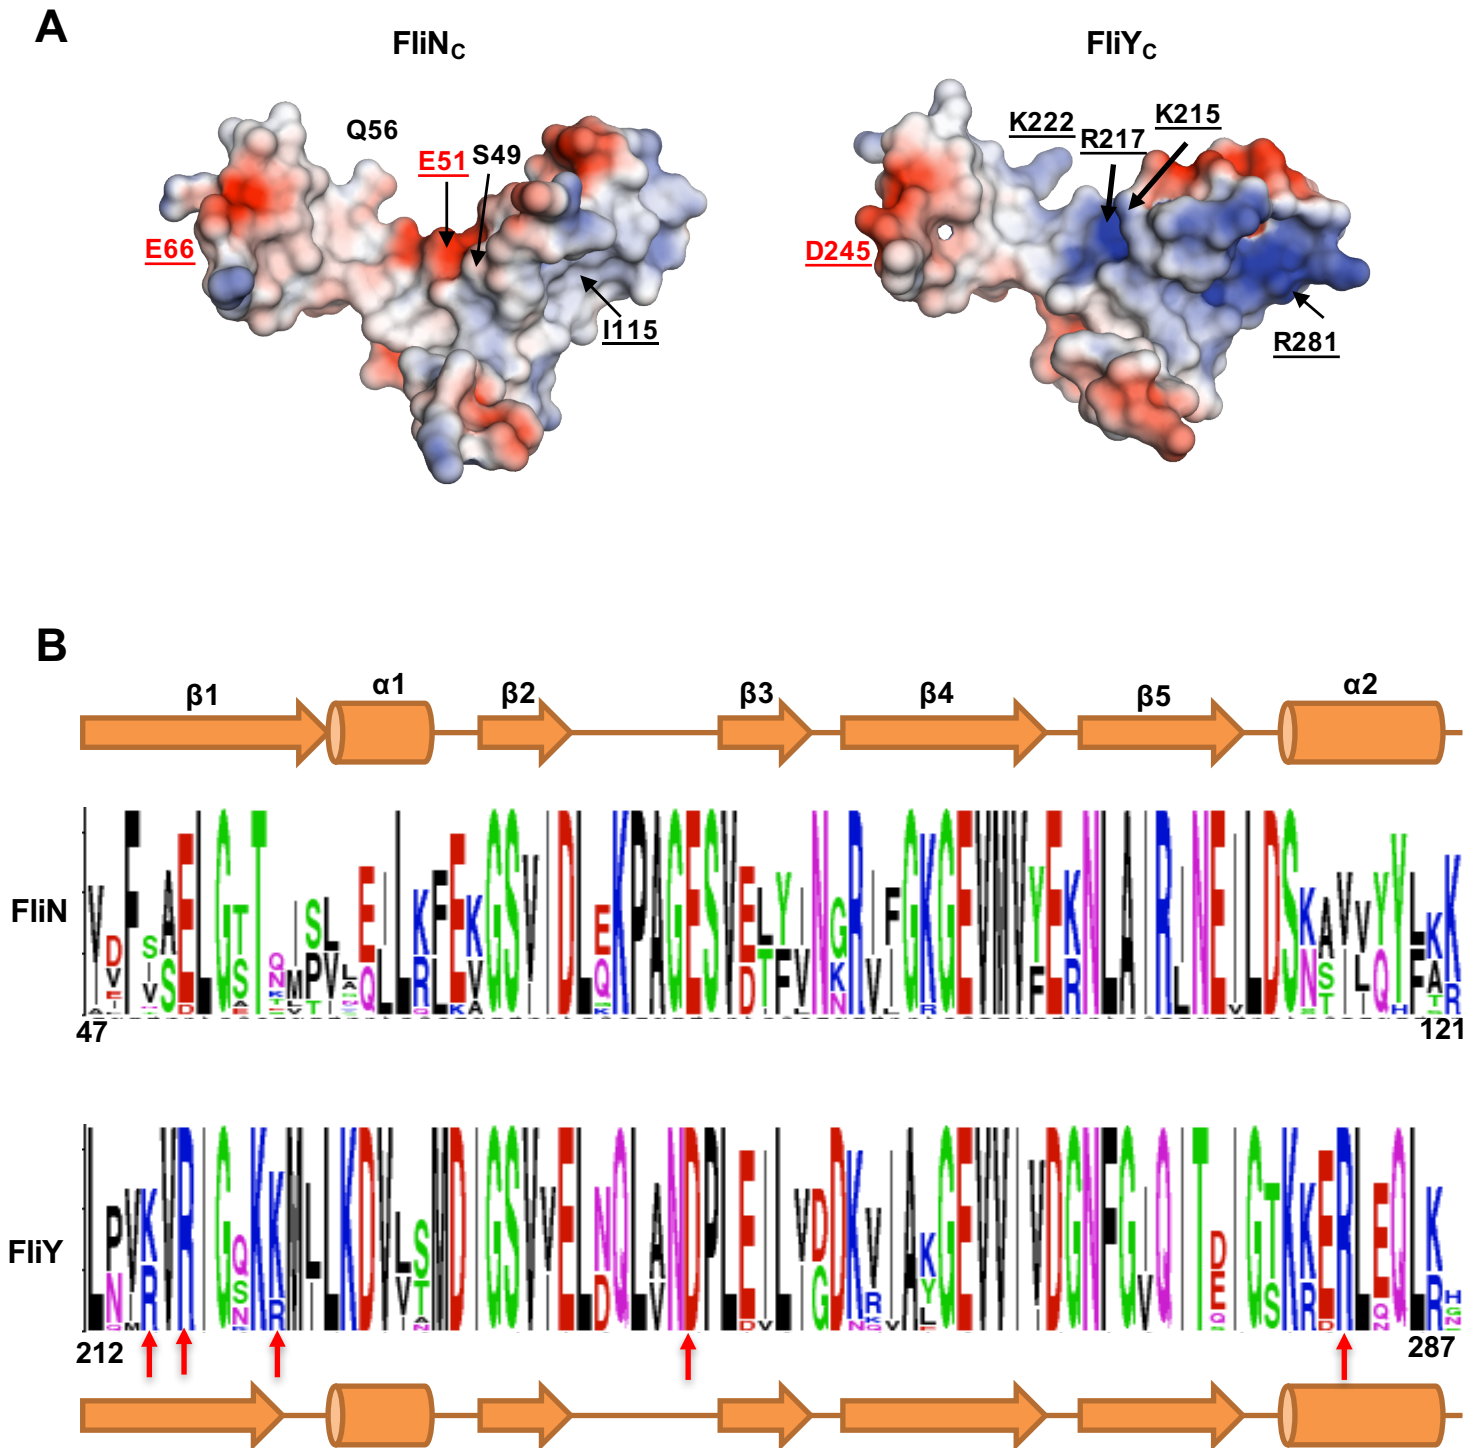

**Unique residues at the interface of FliY<sub>C</sub> and FliN<sub>C</sub> may favor the formation of FliY–FliN heterodimeric complex.** (A) The binding interface of FliY<sub>C</sub>–FliN<sub>C</sub> shown as electrostatic surface. Note that the FliY<sub>C</sub> is characterized by electropositive surface while FliN<sub>C</sub> is more electronegative. (B) Amino acid composition of FliN<sub>C</sub> and FliY<sub>C</sub> from  $\epsilon$ -proteobacteria that contains both FliY and FliN (in *H. pylori* numbering) (Lowenthal et al., 2009). The sequences were aligned by T-coffee and depicted as sequence logo. Secondary structure of FliN<sub>C</sub> and FliY<sub>C</sub> were shown above and below the sequences, respectively. FliY and FliN-specific charged interacting residues at the interface are marked and indicated by arrows.

## Supplemental Figure 5

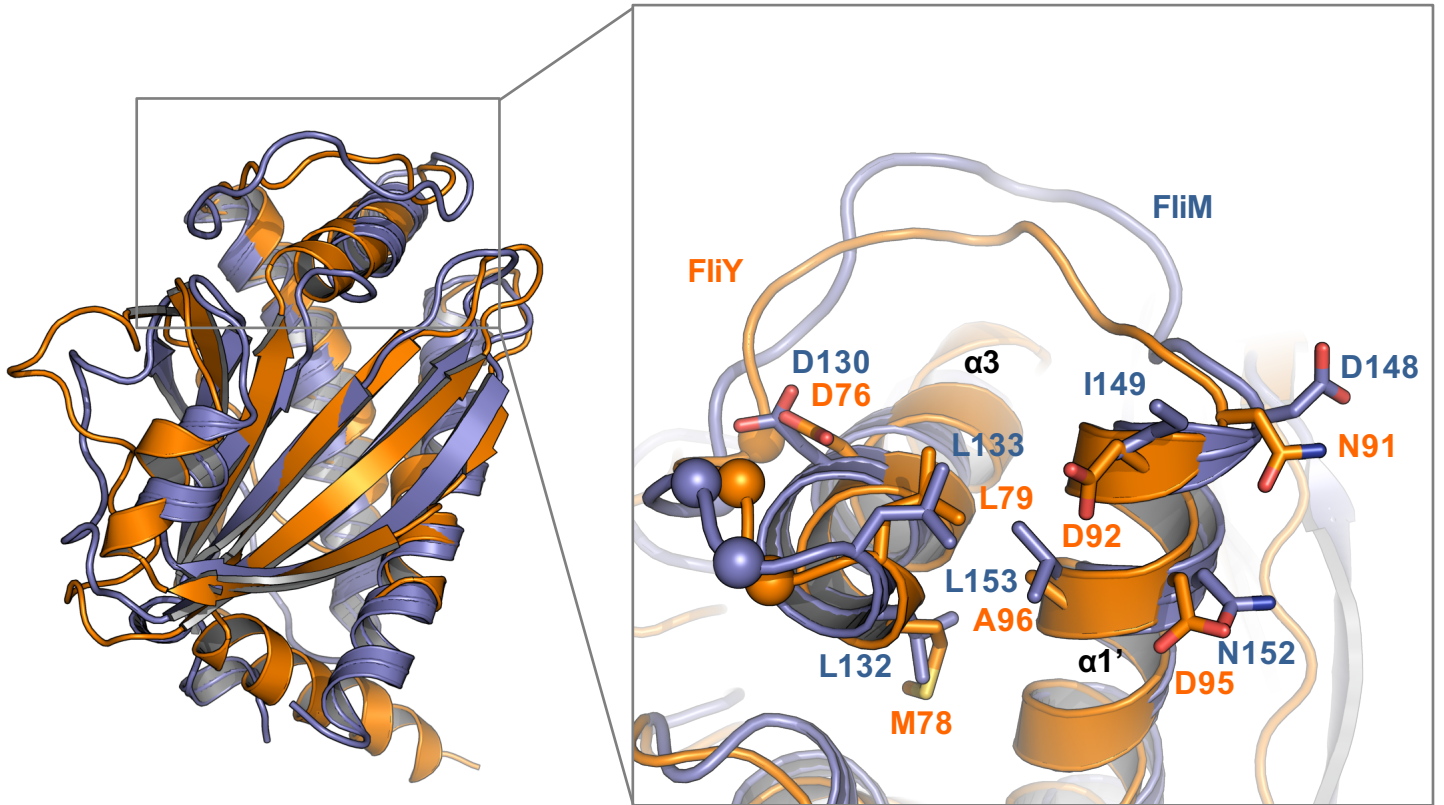

**Superimposition of FliM<sub>M</sub> (PDB-ID: 4FQ0) with FliY<sub>N</sub> model highlighting the sequence variations at the FliG interacting surface between these two proteins.** The conserved GGXG motif is represented as sphere. The residues at  $\alpha 3$  and  $\alpha 1'$  of FliM<sub>M</sub> mediating FliG–FliM interaction as well as the corresponding FliY residues are shown as stick. Note that I149 is replaced by aspartic acid in FliY<sub>N</sub>, and FliM<sub>M</sub> I149D mutation abolished FliG–FliM interaction as demonstrated from our previous study (Lam et al., 2013). The model of FliY<sub>N</sub> was generated by Modeller using FliY<sub>M</sub> from *T. maritima* (PDB-ID: 4HYN) as template (Eswar et al., 2007).
